# Supplementary material
Source: publisher figshare collection journal article supplement (https://gsajournals.figshare.com/ndownloader/files/35005846)
Supplement: Supplementary file 1 [file 35005846]

| **locus** | **accession #** | **forward primer** | **reverse primer** | **amplicon size (bp)** |
| --- | --- | --- | --- | --- |
| ***DDC*** | RPRC005884-RA | ggccgcggCCCTACCGCAAACTCTTATCCTGC | cccggggcATCAAATGTTATTAACAGCCATTTGTGAGG | 691 |
| ***aaNATpreto*** | RPRC015310-RA | ggccgcggTCAGTCCTCTTGCTGCACCAC | cccggggcCACAAGAATGCGGGGGTTCTG | 708 |
| ***ebony P1***  ***ebony P2*** | RPRC007578-RA | ggccgcggGCTGGTGCCGTCTTTACTCT  ggccgcggAAGGTGTGCGCATTAGGAAC | cccggggcTTGCGAATCAGTTCTGCCCT  cccggggcAAGCGTCTCTACCGTTCACA | 514  648 |
| ***tan*** | RPRC007817-RA | ggccgcggCGTTCGCTGCAGTTACCCTC | cccggggcCATTGGCTGCTGGATAAACAGGC | 572 |
| ***yellow*** | RPRC005424-RA | ggccgcggGGCCTCACAACAACTTACCGA | cccggggcCCACACGTATATCGCTCGGA | 721 |
| ***yellow C*** | RPRC008209-RA | ggccgcggGGAGTGCCATCAACCCTCAA | cccggggcGTCAGTGGCGATAAGTCCGT | 819 |
| ***yellow-like*** | RPRC014337-RA | ggccgcggAGTCAGAAGCGATTAGACAGAAAGCAC | cccggggcAGCCTTGGTTAAGTTCATGGTCCAC | 981 |
| ***sepia*** | RPRC007741-RA | ggccgcggGAATGGTTCCTGGAGAAGTTTCCTGC | cccggggcATCTCTAGTCGTTCACACCAAGGC | 366 |
| ***black*** | RPRC010142-RA | ggccgcggCAGTGAATACAGGGCACCCA | cccggggcAAAGGGACCGCTCCTTCATC | 475 |
| ***white P1***  ***white P2*** | RPRC012709-RA | ggccgcggGGATACCAGTGAATGCTAAAACGCTG  ggccgcggCCGCATGGGGTGATTTATGG | cccggggcCGAATGGTATAAACAGGACCCTGG  cccggggcAGCAGACACTCCTTCCCATT | 890  713 |
| ***scarlet*** | RPRC010854-RA | ggccgcggGGTGAGAAGAAGCGTCTATCTTTTGCC | cccggggcTGCACCTTGTATAGCCTGAACTCCAG | 681 |
| ***ok A*** | RPRC009214-RA | ggccgcggCTGTGATCTGCACTATACACCAACCTG | cccggggcAGATCTGTTCCAAAGGCACTGAGAG | 799 |
| ***ok B*** | RPRC002598-RA | ggccgcggAATGGACCGGAGAGTTTCCG | cccggggcCTGTACACTCCGTTTCCAATTTCCC | 876 |
| ***cinnabar*** | RPRC001714-RA | ggccgcggCACGGCAGAACACGTTCAAT | cccggggcTCGAACGTCCTCAAACCCAG | 705 |
| **T7** |  | GAGAATTCTAATACGACTCACTATAGGGCCGCGG | AGGGATCCTAATACGACTCACTATAGGGCCCGGGGC |  |

**Table S1.** Primers used for gene expression knockdown.All primers have an overhang for the T7 promoter sequence (small caps), used as template for a second PCR with the full T7 promoter sequence.
